# Supplementary material
Source: PubMed Central journal article supplement (PMC8374834)
Supplement: NIHMS1679251-supplement-table_2.pdf [file NIHMS1679251-supplement-table_2.pdf]

**Table 2:** Pearson's correlation coefficients for the inflammatory markers

|                               | <b>WBC</b> | <b>hs-CRP<sup>a</sup></b> | <b>Fibrinogen<sup>b</sup></b> |
|-------------------------------|------------|---------------------------|-------------------------------|
| <b>WBC</b>                    | X          | 0.220*                    | 0.233*                        |
| <b>hs-CRP<sup>a</sup></b>     | 0.254*     | X                         | 0.525*                        |
| <b>Fibrinogen<sup>b</sup></b> | 0.233*     | 0.525*                    | X                             |

\* Significant at  $p < 0.05$

a Measure available for n=1446 subjects

b Measure available for n=2198 subjects

WBC: white blood cell count; hs-CRP: high sensitive C-reactive protein
