# Supplementary material
Source: PubMed Central journal article supplement (PMC8374834)
Supplement: NIHMS1679251-supplement-table_3.pdf [file NIHMS1679251-supplement-table_3.pdf]

**Table 3:** Linear regression models in which imaging signatures of white matter disease (WMHV), Alzheimer’s disease (SPARE-AD) and brain aging (SPARE-BA) are the outcomes and WBC, fibrinogen, hs-CRP and antiinflammatory medication are the predictors

| Cohort                           | Outcome  | WBC                                                    | hs-CRP <sup>a</sup>                                | Fibrinogen <sup>b</sup>   | Anti-inflammatory medication | R <sup>2</sup> range for the models per outcome |
|----------------------------------|----------|--------------------------------------------------------|----------------------------------------------------|---------------------------|------------------------------|-------------------------------------------------|
|                                  | WMHV     | 0.576<br>[0.320]<br>(0.171)                            | -0.008<br>[0.107]<br>(0.940)                       | -0.363 [0.412]<br>(0.565) | -0.134 [0.227]<br>(0.738)    | [0.328 -<br>0.338]                              |
| SHIP-2 and SHIP-Trend (n=2204) § | SPARE-AD | 0.148<br>[0.067]<br>(0.108)                            | -0.004<br>[0.023]<br>(0.940)                       | 0.007 [0.087]<br>(0.940)  | 0.058 [0.048]<br>(0.386)     | [0.171 -<br>0.173]                              |
|                                  | SPARE-BA | <b>-0.461</b><br><b>[0.086]</b><br><b>(&lt;0.001)*</b> | <b>-0.093</b><br><b>[0.029]</b><br><b>(0.016)*</b> | -0.205 [0.111]<br>(0.170) | -0.104 [0.061]<br>(0.180)    | [0.672 -<br>0.693]                              |

Coefficient [standard error] (fdr adjusted p-value). \* and bold=significant at p<0.05.

§ Models are adjusted for age, age<sup>2</sup>, sex, and study cohort effects.

a Measure available for n=1446 subjects

b Measure available for n=2198 subjects

SPARE-AD: Spatial Pattern of Atrophy for Recognition of Alzheimer’s disease; SPARE-BA: Spatial Pattern of Atrophy for Recognition of brain aging; WMHV: white matter hyperintensity volume; SHIP: Study of Health in Pomerania; WBC: white blood cell count; hs-CRP: high sensitive C-reactive protein
