# Supplementary material
Source: PubMed Central journal article supplement (PMC8374834)
Supplement: NIHMS1679251-supplement-table_5.pdf [file NIHMS1679251-supplement-table_5.pdf]

**Table 5:** Linear regression models in which the cognitive scores (VLMT and NAI) are the outcomes and WBC, fibrinogen, hs-CRP and antiinflammatory medication are predictors one at a time

| Cohort                                | Outcome | WBC                          | hs-CRP <sup>a</sup>      | Fibrinogen <sup>b</sup>   | Anti-inflammatory medication | R <sup>2</sup> range for the models per outcome |
|---------------------------------------|---------|------------------------------|--------------------------|---------------------------|------------------------------|-------------------------------------------------|
| SHIP-2 <sup>&amp;</sup><br>(n= 661)   | VLMT    | -0.371<br>[0.668]<br>(0.810) | -                        | -0.769 [0.845]<br>(0.635) | 0.114 [0.472]<br>(0.900)     | [0.208 -<br>0.209]                              |
| SHIP-Trend <sup>&amp;</sup> (n= 1543) | NAI     | -0.435<br>[0.215]<br>(0.154) | 0.008 [0.062]<br>(0.900) | -0.605 [0.279]<br>(0.154) | 0.163 [0.152]<br>(0.635)     | [0.193 -<br>0.196]                              |

Coefficient [standard error] (fdr adjusted p-value). \* and bold=significant at p<0.05

& Models are adjusted for age, age<sup>2</sup>, sex and education

a Measure available for n=1446 subjects

b Measure available for n=2198 subjects

TBV: total brain volume; WMV: white matter volume; GMV: gray matter volume; WMHV: hyperintensities volume; WBC: white blood cell count; VLMT: verbal learning and memory test; NAI: Nurnberg age inventory; SPARE-AD: Spatial Pattern of Atrophy for Recognition of Alzheimer's disease; SPARE-BA: Spatial Pattern of Atrophy for Recognition of brain aging; SHIP: Study of Health in Pomerania; hs-CRP: high sensitive C-reactive protein
