# Supplementary material
Source: PubMed Central journal article supplement (PMC8374834)
Supplement: NIHMS1679251-supplement-table_6.pdf [file NIHMS1679251-supplement-table_6.pdf]

**Table 6:** Interactions between antiinflammatory medication and inflammatory markers on the association with total brain volume (TBV) and gray matter volume (GMV) .Results for the interaction terms from linear regression models.

| Cohort                                      | Outcome | Antiinflammatory Medication *WBC | Antiinflammatory Medication *hs-CRP <sup>a</sup> | Antiinflammatory Medication *Fibrinogen <sup>b</sup> | R <sup>2</sup> range for the models per outcome |
|---------------------------------------------|---------|----------------------------------|--------------------------------------------------|------------------------------------------------------|-------------------------------------------------|
| SHIP-2 and SHIP-Trend <sup>§</sup> (n=2204) | TBV     | -3788 [19359] (0.845)            | -                                                | -43925 [23169] (0.247)                               | [0.444]                                         |
|                                             | GMV     | -4292 [10837] (0.845)            | 5285 [3655] (0.247)                              | -20342 [13002] (0.247)                               | [0.514 - 0.515]                                 |

Coefficient [standard error] (fdr adjusted p-value).\* and bold=significant at p<0.05

§ Models are adjusted for age, age<sup>2</sup>, sex, and study cohort effects.

a Measure available for n=1446 subjects

b Measure available for n=2198 subjects

TBV: total brain volume; GMV: gray matter volume; WBC: white blood cell count; hs-CRP: high sensitive C-reactive protein
