# Supplementary material
Source: PubMed Central journal article supplement (PMC8374834)
Supplement: NIHMS1679251-supplement-table_7.pdf [file NIHMS1679251-supplement-table_7.pdf]

**Table 7:** Interactions between antiinflammatory medication and inflammatory markers on the association with brain aging patterns (SPARE-BA). Results for the interaction terms from linear regression models.

| Cohort                                      | Outcome  | Antiinflammatory Medication *WBC | Antiinflammatory Medication *hs-CRP <sup>a</sup> | R <sup>2</sup> range for the models per outcome |
|---------------------------------------------|----------|----------------------------------|--------------------------------------------------|-------------------------------------------------|
| SHIP-2 and SHIP-Trend <sup>§</sup> (n=2204) | SPARE-BA | -0.283 [0.222] (0.202)           | 0.160 [0.075] (0.062)                            | [0.677 - 0.694]                                 |

Coefficient [standard error] (fdr adjusted p-value). \* and bold=significant at p<0.05

§ Models are adjusted for age, age<sup>2</sup>, sex, and study cohort effects.

a Measure available for n=1446 subjects

b Measure available for n=2198 subjects

WBC: white blood cell count; hs-CRP: high sensitive C-reactive protein; SPARE-BA: Spatial Pattern of Atrophy for Recognition of brain aging; SHIP: Study of Health in Pomerania;
